# Supplementary material for: Actomyosin forces and the energetics of red blood cell invasion by the malaria parasite Plasmodium falciparum
Source: PubMed Central journal article supplement (PMC7644091; doi:10.1371/journal.ppat.1009007), 2020-10-26
Supplement: ppat.1009007.s002.pdf [file ppat.1009007.s002.pdf]

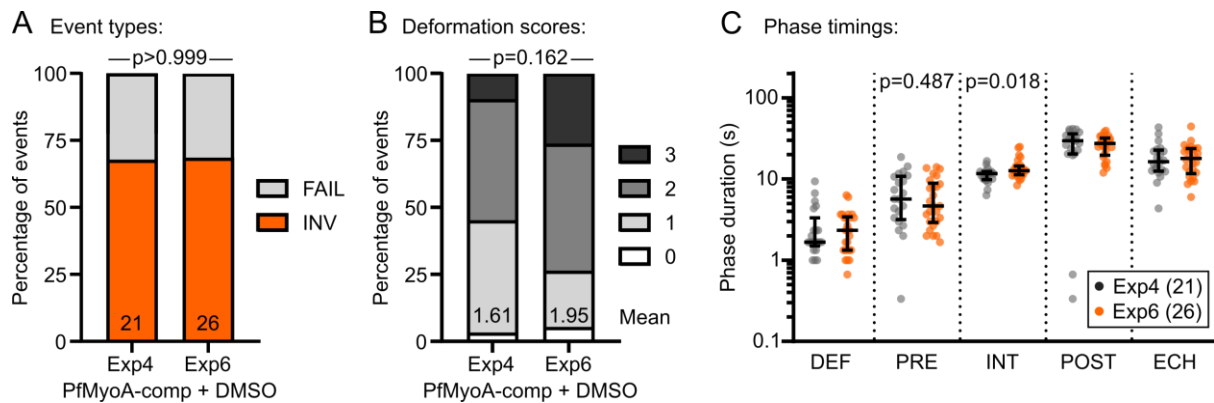

## S2 Fig. Video microscopy of PfMyoA-comp, broken down by biological repeat to assess consistency

**A** To assess the consistency of the two biological repeats, each two technical repeats, performed for each line, since the statistical tests assume that all events are independent, PfMyoA-comp + DMSO was chosen as an example where both repeats (Exp4 and Exp6) had similar numbers of events. The proportion of successful invasion events in both experiments was the same ( $p > 0.999$ , Fisher's exact test, comparing pooled failures to Type A). **B** Comparing the deformation scores across the two experiments showed some differences, but not significant ( $p = 0.162$ , chi square test). **C** Comparing the distributions of each phase duration across the two experiments showed only small differences. The duration of internalisation was significantly higher in Exp6, but the difference was small (11.7 s to 12.7 s). Bars show median and interquartile range. Significance assessed for each phase by Mann-Whitney test, shown when  $p < 0.5$ .
