# Supplementary material for: Actomyosin forces and the energetics of red blood cell invasion by the malaria parasite Plasmodium falciparum
Source: PubMed Central journal article supplement (PMC7644091; doi:10.1371/journal.ppat.1009007), 2020-10-26
Supplement: ppat.1009007.s003.pdf [file ppat.1009007.s003.pdf]

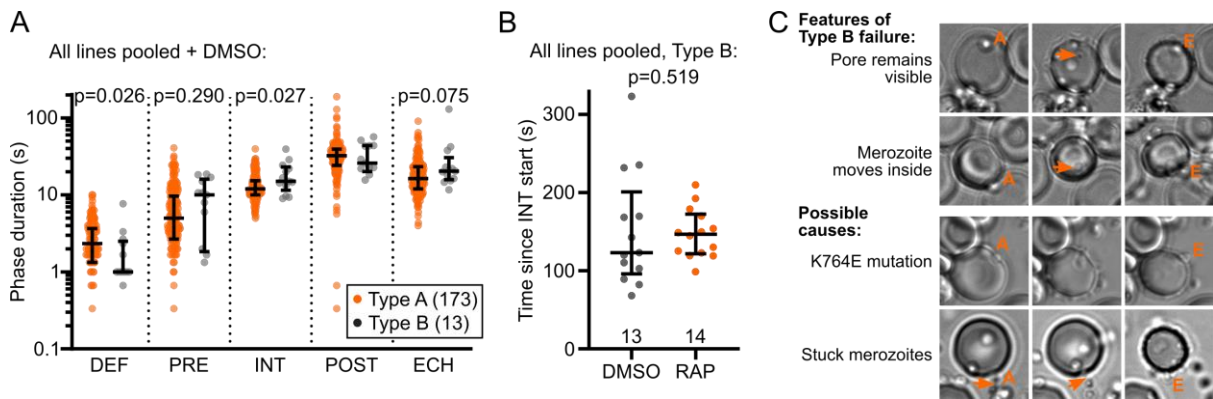

### S3 Fig. Type B events show slower internalisation

**A** From all lines after DMSO treatment, comparing Type A events to Type B events shows a significantly shorter deformation period and slower internalisation, with a trend to a longer pause before internalisation, consistent with either a merozoite producing less force or an RBC providing more resistance to invasion. Bars show median and interquartile range. Significance assessed for each phase by Mann-Whitney test, shown when  $p < 0.5$ . **B** Comparing Type B failures from all DMSO- or RAP-treated lines shows no difference in the delay from start of internalisation to merozoite ejection. Bars show median and interquartile range. Significance assessed by Mann-Whitney test. **C** Example images of Type B failure where the invasion pore remained visible, hence not resealed (A= attachment, E= ejection); the incompletely-internalised merozoite continuing to move in a swirling pattern within the invagination; an ejection from PfMyoA-K764E after RAP treatment, where Type B failure was more common; and an event where resealing after internalisation was prevented by tethering to a sister merozoite.
