# Supplementary material for: Actomyosin forces and the energetics of red blood cell invasion by the malaria parasite Plasmodium falciparum
Source: PubMed Central journal article supplement (PMC7644091; doi:10.1371/journal.ppat.1009007), 2020-10-26
Supplement: ppat.1009007.s009.pdf [file ppat.1009007.s009.pdf]

**S1 Table. Oligonucleotides used in this study for genotyping PCR and sequencing**

| #  | Locus            | Part                                | Sequence                                                          | Source     |
|----|------------------|-------------------------------------|-------------------------------------------------------------------|------------|
| 1  | <i>p230p</i>     | WT <sup>a</sup> /IN <sup>b</sup> -F | ACCATCAACATTATCGTCAG                                              | [1]        |
| 2  | <i>p230p</i>     | WT-R                                | TCTTCATCAGCCTGGTAAC                                               | [1]        |
| 3  | <i>p230p</i>     | IN-R                                | CATTTACACATAAATGTCACAC                                            | [1]        |
| 4  | PfMyoA-K764E     | IN-F                                | GTCATTGATTGGATCTCAGTTC                                            | This study |
| 5  | PfMyoA-K764E     | IN-R                                | GGATACGAGCCAGCATAGTC                                              | This study |
| 6  | PfMyoA-cKO       | IN/EX <sup>c</sup> -F               | GGTCGTTTCATGCAGTTGGT                                              | [2]        |
| 7  | PfMyoA-cKO       | IN-R                                | GCCAGCCACGATAGCCGCGCTGCCTCGTCCTGCAGT<br>TCATTCAGGGCACCGGACAGGTTCG | [2]        |
| 8  | PfMyoA-cKO       | EX-R                                | ACCTTCACCCTCTCCACTGAC                                             | [2]        |
| 9  | PfMyoB-cKO       | WT/IN/EX-F                          | ATGGGATCGAAAAGGGTGGT                                              | This study |
| 10 | PfMyoB-cKO       | WT-R                                | TCCATGATCACTCGTCCTCAC                                             | This study |
| 11 | PfMyoB-cKO       | IN-R                                | AAGTCTCCACAATTGATAAAGAG                                           | This study |
| 12 | PfMyoB-cKO       | EX-R                                | TTATTTGTACAGTTCATCCATACC                                          | This study |
| 13 | pDC2-p230p-BSD   | Seq <sup>d</sup> ( <i>bsd</i> )     | TTTTTGTAAATTTCTGTGTTTATG                                          | This study |
| 14 | pDC2-generic     | Seq (gRNA)                          | AAGCACCGACTCGGTGCCAC                                              | Marcus Lee |
| 15 | p230p-prMA-sfGFP | Seq ( <i>sfgfp</i> )                | TGAACCATACGGGTTGTTG                                               | This study |
| 16 | p230p-prMA-MyoA  | Seq ( <i>myoa</i> )                 | CTCCTGGAGCCAAGCAC                                                 | This study |

<sup>a</sup>WT = wild type locus, <sup>b</sup>IN = integrated locus, <sup>c</sup>EX = excised locus, <sup>d</sup>Seq = sequencing

## References

1. Ashdown GW, Dimon M, Fan M, Sánchez-Román Terán F, Witmer K, Gaboriau DCA, et al. A machine learning approach to define antimalarial drug action from heterogeneous cell-based screens. *Sci Adv.* 2020;6: eaba9338. doi:10.1126/sciadv.aba9338
2. Robert-Paganin J, Robblee JP, Auguin D, Blake TCA, Bookwalter CS, Kremontsova EB, et al. Plasmodium myosin A drives parasite invasion by an atypical force generating mechanism. *Nat Commun.* 2019;10: 3286. doi:10.1038/s41467-019-11120-0
