# Supplementary material for: Actomyosin forces and the energetics of red blood cell invasion by the malaria parasite Plasmodium falciparum
Source: PubMed Central journal article supplement (PMC7644091; doi:10.1371/journal.ppat.1009007), 2020-10-26
Supplement: ppat.1009007.s010.pdf [file ppat.1009007.s010.pdf]

**S2 Table. Oligonucleotides used in this study for cloning PCR and guide RNAs**

| #  | Construct           | Part                 | Sequence                                                            | Source     |
|----|---------------------|----------------------|---------------------------------------------------------------------|------------|
| 17 | pDC2-p230p-BSD      | BSD-F                | ATATCCATGGCCAAGCCTTTGTCTCAAGAAGAATCC                                | This study |
| 18 | pDC2-p230p-BSD      | BSD-R                | ATATCCGCGGTTAGCCCTCCCACACATAAC                                      | This study |
| 19 | p230p-prMA-sfGFP    | prMA-F               | ATATCCGCGGAGCATGCACAATTAAGAAGACG                                    | This study |
| 20 | p230p-prMA-sfGFP    | prMA-R               | ATATGCTAGCTTTTTTTTTTTTTTATAAATATGAA<br>AAG                          | This study |
| 21 | p230p-prMA-PfMyoA   | MyoA-F               | CTTTTCATATTTATAAAAAAAAAAAAAAAAAAGCTAGCA<br>TGGCCGTTACCAACG          | This study |
| 22 | p230p-prMA-PfMyoA   | MyoA-R               | GATATTTACTTATTTATTTTATCTGCATATTTAAA<br>AATCCTGCAGTTAGACCGCATAATCCGG | This study |
| 23 | p230p-prMA-K764E    | SDM <sup>a</sup> -F  | GCAAGAGGGTGTGAAATTTTAAACAAAAATAC                                    | This study |
| 24 | p230p-prMA-K764E    | SDM-R                | ATTTTTGTAAATTTTTCAGCACCTCTTGC                                       | This study |
| 25 | p230p-prMA-S19A     | SDM-F                | GTGAGGAGAGTAGCTAACGTGGAGG                                           | This study |
| 26 | p230p-prMA-S19A     | SDM-R                | CAAAAGCCTCCACGTTAGCTACTCTCCTC                                       | This study |
| 27 | p230p-prMA-DN       | MyoA-F               | CTTTTCATATTTATAAAAAAAAAAAAAAAAAAGCTAGCA<br>TGAACGTGGAGCTTTTGATAAATC | This study |
| 28 | pUC-PfMyoB-CK       | HR <sup>b</sup> -F   | CAGTCACGACGTTGTAAAACGACGGCCAGTGAATTC<br>TTAGAGAATTTTCATAGGTATTTTGG  | This study |
| 29 | pUC-PfMyoB-CK       | HR-R                 | TGCGTAATCCGGTACATCATATGGGTACATTTTCATG<br>CTCTTTTATATATTTGTACTTAC    | This study |
| 30 | pUC-PfMyoB-CK       | SF <sup>c</sup> -F   | ATGTACCCATATGATGTACCG                                               | This study |
| 31 | pUC-PfMyoB-CK       | SF-R                 | TTATTTGTACAGTTTCATCCATACC                                           | This study |
| 32 | pUC-PfMyoB-CK       | 3UTR <sup>d</sup> -F | ACGCATGGTATGGATGAACTGTACAAATAACTCGAG<br>AAATCGGGAAAATAAAATGG        | This study |
| 33 | pUC-PfMyoB-CK       | 3UTR-R               | TATGACCATGATTACGCCAAGCTTGCAATGCCTGCAG<br>GTCGTCCCAATCATTTTTTC       | This study |
| 34 | pDC2-p230p-hDHFR    | gRNA <sup>e</sup> -F | TATTAGGCTGATGAAGACATCGGG                                            | [1]        |
| 35 | pDC2-p230p-hDHFR    | gRNA-R               | AAACCCCGATGTCTTCATCAGCCT                                            | [1]        |
| 36 | pDC2-pfmyob-hDHFR-1 | gRNA-F               | TATTGTATAAGATAGGAAAAAGCA                                            | This study |
| 37 | pDC2-pfmyob-hDHFR-1 | gRNA-R               | AAACTGCTTTTTCTATCTTATAC                                             | This study |
| 38 | pDC2-pfmyob-hDHFR-2 | gRNA-F               | TATTGTAGAAGCATTTGACAAAAG                                            | This study |
| 39 | pDC2-pfmyob-hDHFR-2 | gRNA-R               | AAACCTTTTGTCAAATGCTTCTAC                                            | This study |

<sup>a</sup>SDM = site-directed mutagenesis, <sup>b</sup>HR = homology region, <sup>c</sup>SF = synthetic fragment, <sup>d</sup>3UTR = 3' un-translated region, <sup>e</sup>gRNA = guide RNA.

## References

1. Ashdown GW, Dimon M, Fan M, Sánchez-Román Terán F, Witmer K, Gaboriau DCA, et al. A machine learning approach to define antimalarial drug action from heterogeneous cell-based screens. *Sci Adv.* 2020;6: eaba9338. doi:10.1126/sciadv.aba9338
